# Supplementary material for: Association of Serum Vitamin C With NAFLD and MAFLD Among Adults in the United States
Source: PubMed Central journal article supplement (PMC8854786; doi:10.3389/fnut.2021.795391), 2022-02-04
Supplement: Table_1.pdf [file Table_1.pdf]

Supplementary Table 1 General characteristics of participants(n=4494) stratified by gender in the NHANES 2017-2018

| Characters                   | Total<br>(n=4494)      | Male<br>(n=2213)   | Female<br>(n=2281)     | p-<br>Value |
|------------------------------|------------------------|--------------------|------------------------|-------------|
| Age (years)                  | 47.13±17.49            | 46.24±17.39        | 47.99±17.53            | 0.001       |
| 18~39                        | 38.37(36.27-<br>40.52) | 40.26(37.12-43.49) | 36.54(33.79-<br>39.39) | 0.006       |
| 40~59                        | 34.09(31.92-<br>36.34) | 34.16(30.98-37.49) | 34.03(31.09-<br>37.10) |             |
| 60~80                        | 27.53(25.65-29.5)      | 25.57(22.99-28.33) | 29.43(26.77-<br>32.24) |             |
| Race/ethnicity               |                        |                    |                        | 0.782       |
| Hispanic                     | 16.44(15.27-<br>17.68) | 16.78(15.05-18.66) | 16.11(14.56-<br>17.79) |             |
| Non-Hispanic White           | 62.61(60.71-<br>64.47) | 62.86(60.07-65.58) | 62.37(59.77-<br>64.90) |             |
| Non-Hispanic Black           | 10.54(9.75-11.39)      | 9.99(8.91-11.19)   | 11.07(9.96-12.29)      |             |
| Non-Hispanic Asian           | 5.67(5.18-6.21)        | 5.55(4.86-6.35)    | 5.79(5.11-6.55)        |             |
| Other races <sup>1</sup>     | 4.74(3.91-5.73)        | 4.81(3.64-6.34)    | 4.67(3.58-6.06)        |             |
| Education                    |                        |                    |                        | 0.010       |
| More than high school        | 60.93(58.8-63.02)      | 58.47(55.29-61.58) | 63.32(60.45-<br>66.09) |             |
| High school or<br>equivalent | 27.61(25.66-<br>29.64) | 29.1(26.23-32.16)  | 26.16(23.58-<br>28.91) |             |
| Less than high school        | 11.39(10.4-12.46)      | 12.35(10.86-14.01) | 10.46(9.2-11.88)       |             |
| Not recorded                 | 0.07(0.03-0.16)        | 0.08(0.02-0.28)    | 0.06(0.02-0.17)        |             |
| Poverty-income ratio         |                        |                    |                        | 0.076       |
| <1.3                         | 18.19(16.85-<br>19.61) | 16.76(14.92-18.77) | 19.57(17.67-<br>21.62) |             |
| 1.3-1.8                      | 8.2(7.35-9.15)         | 8.14(6.93-9.54)    | 8.27(7.1-9.6)          |             |
| >1.8                         | 63.57(61.6-65.51)      | 64.51(61.61-67.3)  | 62.67(59.95-<br>65.31) |             |
| Not recorded                 | 10.04(8.88-11.32)      | 10.6(8.86-12.63)   | 9.49(8.04-11.18)       |             |
| BMI group                    |                        |                    |                        | <0.001      |
| <25                          | 27.6(25.63-29.65)      | 23.67(21.04-26.52) | 31.39(28.57-<br>34.36) |             |
| 25~30                        | 31.5(29.47-33.6)       | 34.77(31.71-37.96) | 28.33(25.71-<br>31.11) |             |
| ≥30                          | 40.4(38.24-42.6)       | 40.86(37.67-44.14) | 39.95(37.06-<br>42.91) |             |
| Not recorded                 | 0.5(0.33-0.77)         | 0.69(0.4-1.21)     | 0.32(0.17-0.59)        |             |
| Physical activity level      |                        |                    |                        | <0.001      |
| Inactive                     | 50.77(48.54-53)        | 44.73(41.51-48.01) | 56.6(53.57-59.58)      |             |
| Less active                  | 7.43(6.31-8.73)        | 6.56(5.15-8.31)    | 8.28(6.64-10.29)       |             |

|                                      |                    |                    |                    |        |
|--------------------------------------|--------------------|--------------------|--------------------|--------|
| Active                               |                    |                    | 35.12(32.29-38.05) |        |
|                                      | 41.8(39.61-44.02)  | 48.71(45.44-51.99) |                    |        |
| Daily alcohol drinking               |                    |                    |                    | <0.001 |
| Non-drinkers                         | 7.53(6.5-8.71)     | 5.73(4.42-7.41)    | 9.27(7.78-11.02)   |        |
| Moderate-drinkers                    | 29.66(27.58-31.82) | 32.04(28.98-35.27) | 27.36(24.61-30.29) |        |
| Heavy-drinkers                       | 14.48(13-16.09)    | 7.4(5.93-9.21)     | 21.32(18.92-23.93) |        |
| Binge-drinkers                       | 32.79(30.72-34.94) | 41.52(38.32-44.79) | 24.36(21.83-27.07) |        |
| Not recorded                         | 15.54(14.15-17.03) | 13.3(11.44-15.42)  | 17.7(15.73-19.86)  |        |
| History of diabetes                  |                    |                    |                    | 0.069  |
| Yes                                  | 12.82(11.54-14.22) | 13.67(11.77-15.8)  | 12(10.34-13.89)    |        |
| Having HBV infection                 |                    |                    |                    | 0.237  |
| Yes                                  | 0.94(0.62-1.41)    | 1.12(0.61-2.04)    | 0.76(0.46-1.26)    |        |
| Having HCV infection                 |                    |                    |                    | 0.078  |
| Yes                                  | 2.49(1.83-3.38)    | 2.95(1.94-4.47)    | 2.04(1.29-3.21)    |        |
| Dietary VC supplement                |                    |                    |                    | <0.001 |
| Yes                                  | 38.03(35.85-40.27) | 33.96(30.81-37.26) | 41.97(38.98-45.01) |        |
| Daily dose of supplement of VC, mg   |                    |                    |                    | <0.001 |
| none                                 | 74.68(72.6-76.65)  | 79.22(76.32-81.86) | 70.28(67.31-73.1)  |        |
| 1-60                                 | 10.08(8.81-11.52)  | 8.08(6.46-10.06)   | 12.02(10.15-14.18) |        |
| 61-120                               | 5.03(4.04-6.26)    | 4.47(3.11-6.39)    | 5.58(4.25-7.29)    |        |
| 121-500                              | 5.62(4.6-6.84)     | 4.36(3.26-5.82)    | 6.82(5.22-8.88)    |        |
| >500                                 | 4.59(3.7-5.68)     | 3.86(2.69-5.52)    | 5.29(4.06-6.87)    |        |
| Monthly dose of supplement of VC, mg |                    |                    |                    | 0.004  |
| none                                 | 67.9(65.74-69.98)  | 69.59(66.37-72.63) | 66.26(63.34-69.06) |        |
| 1-1800                               | 15.28(13.75-16.94) | 14.61(12.37-17.19) | 15.92(13.93-18.14) |        |
| 1800-3600                            | 5.79(4.75-7.06)    | 6.24(4.59-8.44)    | 5.36(4.19-6.83)    |        |
| >3600                                | 11.03(9.66-12.57)  | 9.55(7.79-11.65)   | 12.46(10.46-14.78) |        |
| Dietary VC intake by food, mg/d      |                    |                    |                    | <0.001 |
| 0-18.5                               | 22.73(20.96-24.61) | 22.44(19.92-25.19) | 23.01(20.58-25.65) |        |
| 18.5-47.1                            | 25.62(23.66-       | 26.20(23.31-29.31) | 25.05(22.46-       |        |

|                                        |                    |                    |                    |        |
|----------------------------------------|--------------------|--------------------|--------------------|--------|
|                                        | 27.68)             |                    | 27.83)             |        |
| 47.1-106.5                             | 24.44(22.53-26.45) | 22.23(19.55-25.16) | 26.57(23.92-29.39) |        |
| >106.5                                 | 21.68(19.94-23.52) | 24.01(21.39-26.85) | 19.42(17.21-21.85) |        |
| Not recorded                           | 5.53(4.72-6.47)    | 5.11(3.97-6.56)    | 5.94(4.85-7.25)    |        |
| Laboratory parameters                  |                    |                    |                    |        |
| Smoking(serum cotinine levels)         |                    |                    |                    | <0.001 |
| <0.015                                 | 38.17(35.97-40.42) | 33.27(30.14-36.57) | 42.91(39.89-45.98) |        |
| 0.015-3                                | 37.41(35.31-39.56) | 37.11(34.02-40.31) | 37.71(34.88-40.62) |        |
| ≥3                                     | 24.04(22.27-25.9)  | 29.4(26.62-32.33)  | 18.87(16.74-21.2)  |        |
| Not recorded                           | 0.37(0.15-0.9)     | 0.22(0.09-0.53)    | 0.52(0.16-1.7)     |        |
| ALT(U/L)                               | 47.13±17.49        | 46.24±17.39        | 47.99±17.53        | 0.001  |
| ALB(g/L)                               | 23.26±17.77        | 27.92±19.64        | 18.73±14.37        | <0.001 |
| ALP(U/L)                               | 41.02±3.21         | 41.96±3.09         | 40.10±3.06         | <0.001 |
| AST(U/L)                               | 76.34±25.33        | 76.54±25.67        | 76.15±25.00        | 0.601  |
| GGT(U/L)                               | 22.31±13.41        | 24.45±14.31        | 20.23±12.12        | <0.001 |
| TB(umol/L)                             | 29.71±40.06        | 35.61±45.43        | 23.99±33.06        | <0.001 |
| Platelet(×10 <sup>9</sup> /L)          | 8.14±4.83          | 9.5±5.38           | 6.83±3.80          | <0.001 |
| CRP(mg/L)                              | 244.79±61.42       | 229.79±54.99       | 259.30±63.78       | <0.001 |
| TC(mmol/L)                             | 3.72±7.16          | 3.1±6.19           | 4.32±7.94          | <0.001 |
| Serum VC(umol/L)                       | 51.29±29.39        | 46.16±24.9         | 56.25±32.40        | <0.001 |
| <30.9                                  | 25.39(23.51-27.38) | 29.31(26.43-32.36) | 21.61(19.23-24.19) |        |
| 30.9-50.5                              | 23.01(21.24-24.87) | 25.46(22.81-28.29) | 20.64(18.35-23.14) |        |
| 50.5-67.0                              | 24.94(23.01-26.96) | 27.48(24.55-30.61) | 22.48(20.05-25.11) |        |
| ≥67.0                                  | 26.67(24.74-28.69) | 17.76(15.38-20.42) | 35.27(32.41-38.24) |        |
| Transient Elastography                 |                    |                    |                    |        |
| Median stiffness(kPa)                  | 5.66±4.73          | 6.02±4.91          | 5.31±4.52          | <0.001 |
| Controlled attenuation parameter(dB/m) | 262.47±62.7        | 272.47±63.2        | 252.80±60.65       | <0.001 |
| NAFLD                                  |                    |                    |                    | <0.001 |
| Yes                                    | 37.23(35.13-39.39) | 39.9(36.77-43.12)  | 34.65(31.86-37.55) |        |
| MAFLD                                  |                    |                    |                    | <0.001 |
| Yes                                    | 47.98(45.76-50.21) | 53.56(50.26-56.82) | 42.59(39.64-45.59) |        |
| Liver fibrosis                         |                    |                    |                    | <0.001 |

|                 |                    |                 |                    |       |
|-----------------|--------------------|-----------------|--------------------|-------|
| Yes             | 21.23(19.48-23.08) | 24.65(22-27.52) | 17.92(15.71-20.35) |       |
| Liver cirrhosis |                    |                 |                    | 0.001 |
| Yes             | 3.08(2.35-4.02)    | 3.92(2.75-5.55) | 2.27(1.5-3.41)     |       |

Note: Values are weighted mean±SD or weighted % (95% confidence interval). P values are weighted. <sup>1</sup>Other races include American Indian or Alaska Native, Native Hawaiian or other Pacific Islander, and multiracial persons.

Abbreviations: ALT, alanine aminotransferase; AST, aspartate aminotransferase; ALP, alkaline Phosphatase; ALB, albumin; BMI, body mass index; CRP, C reactive protein; GGT, gamma glutamyl transferase; HBV, hepatitis B virus; HCV, hepatitis C virus; MAFLD, metabolic dysfunction-associated fatty liver disease; NHANES, National Health and Nutrition Examination Survey; NAFLD, nonalcoholic fatty liver disease; TC, total cholesterol; TB, total bilirubin; VC, vitamin C.

Supplementary Table 2 Subgroup analysis of associations between serum vitamin C level and NAFLD(n=4494), NHANES 2017–2018.

| <b>Full adjustment model OR (95%CI), P</b> |                     |                             |                             |                             |
|--------------------------------------------|---------------------|-----------------------------|-----------------------------|-----------------------------|
| <b>Quartiles of vitamin C , umol/L</b>     | <b>Q1(&lt;30.9)</b> | <b>Q2(30.9-50.5)</b>        | <b>Q3(50.5-67.0)</b>        | <b>Q4(≥67.0)</b>            |
| <b>Stratified by age group(years)</b>      |                     |                             |                             |                             |
| 18-39                                      | Reference           | 0.769(0.477,1.240)<br>0.281 | 0.541(0.330,0.888)<br>0.015 | 0.529(0.302,0.927)<br>0.026 |
| 40-59                                      | Reference           | 0.678(0.407,1.131)<br>0.137 | 0.639(0.367,1.112)<br>0.113 | 0.808(0.451,1.447)<br>0.473 |
| 60-80                                      | Reference           | 0.838(0.475,1.479)<br>0.542 | 1.085(0.631,1.865)<br>0.769 | 1.051(0.599,1.846)<br>0.861 |
| <b>Stratified by gender</b>                |                     |                             |                             |                             |
| Male                                       | Reference           | 0.744(0.492,1.125)<br>0.161 | 0.761(0.495,1.168)<br>0.212 | 0.960(0.596,1.548)<br>0.869 |
| Female                                     | Reference           | 0.776(0.502,1.200)<br>0.255 | 0.595(0.388,0.912)<br>0.017 | 0.657(0.423,1.021)<br>0.062 |
| <b>Stratified by race</b>                  |                     |                             |                             |                             |
| Hispanic                                   | Reference           | 0.699(0.436,1.121)<br>0.137 | 0.671(0.402,1.118)<br>0.126 | 0.540(0.311,0.938)<br>0.029 |
| Non-Hispanic White                         | Reference           | 0.691(0.423,1.128)<br>0.139 | 0.595(0.372,0.952)<br>0.031 | 0.837(0.513,1.366)<br>0.477 |
| Non-                                       | Reference           | 1.088(0.665,1.77)           | 1.426(0.849,2.39)           | 0.640(0.349,1.17)           |

|                          |          |                  |                  |                  |
|--------------------------|----------|------------------|------------------|------------------|
| Hispanic                 | e        | 9)0.737          | 5)0.179          | 3)0.149          |
| Black                    |          |                  |                  |                  |
| Non-Hispanic             | Referenc | 0.572(0.301,1.08 | 0.296(0.149,0.58 | 0.197(0.092,0.42 |
| Asian                    | e        | 5)0.087          | 6) <0.001        | 2) <0.001        |
| Other                    | Referenc | 0.986(0.328,2.95 | 0.481(0.163,1.41 | 1.510(0.427,5.34 |
| racess <sup>1</sup>      | e        | 8)0.979          | 9)0.185          | 6)0.523          |
| <b>Stratified by BMI</b> |          |                  |                  |                  |
| <25kg/m <sup>2</sup>     | Referenc | 0.782(0.354,1.72 | 0.779(0.353,1.71 | 0.833(0.357,1.94 |
|                          | e        | 4)0.542          | 7)0.536          | 4)0.673          |
| 25-30kg/m <sup>2</sup>   | Referenc | 0.849(0.509,1.41 | 0.799(0.484,1.31 | 0.712(0.412,1.23 |
|                          | e        | 7)0.532          | 9)0.380          | 2)0.225          |
| ≥30kg/m <sup>2</sup>     | Referenc | 0.718(0.477,1.08 | 0.613(0.399,0.94 | 0.892(0.549,1.45 |
|                          | e        | 0)0.112          | 1)0.025          | 0)0.645          |

Note: Full adjustment model adjusted for: gender; age; race; education; BMI; diabetes; physical activity status; serum cotinine levels; dietary vitamin C supplement, dietary vitamin C intake by food, and poverty income ratio. <sup>1</sup>Other races include American Indian or Alaska Native, Native Hawaiian, or other Pacific Islander, and multiracial persons.

Abbreviations: NHANES, National Health and Nutrition Examination Survey; BMI, body mass index; NAFLD, nonalcoholic fatty liver disease; OR, odds ratio; 95%CI, 95% confidence interval.

Supplementary Table 3 Subgroup analysis of associations between serum vitamin C level and MAFLD(n=4494), NHANES 2017–2018.

| <b>Full adjustment model OR (95%CI), P</b> |          |                     |                      |                      |                  |
|--------------------------------------------|----------|---------------------|----------------------|----------------------|------------------|
| <b>Quartiles of vitamin C , umol/L</b>     |          | <b>Q1(&lt;30.9)</b> | <b>Q2(30.9-50.5)</b> | <b>Q3(50.5-67.0)</b> | <b>Q4(≥67.0)</b> |
| <b>Stratified by age group(years)</b>      |          |                     |                      |                      |                  |
| 18-39                                      | Referenc | 0.956(0.641,1.42    | 0.535(0.352,0.81     | 0.342(0.211,0.55     |                  |
|                                            | e        | 6)0.826             | 4)0.003              | 4) <0.001            |                  |
| 40-59                                      | Referenc | 0.460(0.274,0.77    |                      |                      |                  |
|                                            | e        | 4)0.003             | 0.464(0.265,0.81     | 0.516(0.291,0.91     |                  |
|                                            |          |                     | 4)0.007              | 5)0.024              |                  |
| 60-80                                      | Referenc | 1.304(0.761,2.23    | 0.923(0.544,1.56     |                      | 0.648(0.370,1.13 |
|                                            | e        | 3)0.334             | 6)0.766              | 3)                   | 0.128            |
| <b>Stratified by gender</b>                |          |                     |                      |                      |                  |
| Male                                       | Referenc | 0.867(0.590,1.27    | 0.661(0.439,0.99     | 0.619(0.392,0.97     |                  |
|                                            | e        | 4)0.467             | 4)0.047              | 8)0.040              |                  |
| Female                                     | Referenc | 0.755(0.505,1.13    | 0.496(0.334,0.73     | 0.411(0.275,0.61     |                  |

|                           |          |                  |                  |                  |
|---------------------------|----------|------------------|------------------|------------------|
|                           | e        | 1)0.173          | 8)0.001          | 6) <0.001        |
| <b>Stratified by race</b> |          |                  |                  |                  |
| Hispanic                  | Referenc | 0.813(0.508,1.30 | 0.664(0.400,1.10 | 0.389(0.231,0.65 |
|                           | e        | 1)0.388          | 2)0.113          | 3)<0.001         |
| Non-Hispanic              | Referenc | 0.766(0.499,1.17 | 0.492(0.325,0.74 | 0.495(0.324,0.75 |
| White                     | e        | 5)0.222          | 5)0.001          | 6)0.001          |
| Non-Hispanic              | Referenc | 0.761(0.499,1.16 | 0.928(0.581,1.48 | 0.450(0.265,0.76 |
| Black                     | e        | 0)0.204          | 2)0.754          | 3)0.003          |
| Non-Hispanic              | Referenc | 0.674(0.359,1.26 | 0.305(0.157,0.59 | 0.194(0.095,0.39 |
| Asian                     | e        | 7)0.220          | 0) <0.001        | 7) <0.001        |
| Other races <sup>1</sup>  | Referenc | 1.608(0.577,4.47 | 1.104(0.381,3.19 | 1.800(0.559,5.80 |
|                           | e        | 6)0.364          | 9)0.856          | 1)0.325          |
| <b>Stratified by BMI</b>  |          |                  |                  |                  |
| <25kg/m <sup>2</sup>      | Referenc | 0.685(0.329,1.42 | 1.231(0.486,3.12 | 0.979(0.438,2.18 |
|                           | e        | 7)0.312          | 1)0.661          | 7)0.959          |
| 25-30kg/m <sup>2</sup>    | Referenc | 1.001(0.606,1.65 | 0.644(0.393,1.05 | 0.729(0.432,1.23 |
|                           | e        | 5)0.996          | 5)0.080          | 1)0.237          |
| ≥30kg/m <sup>2</sup>      | Referenc | 0.767(0.473,1.24 | 0.610(0.376,0.98 | 0.651(0.380,1.11 |
|                           | e        | 3)0.281          | 9)0.045          | 2)0.116          |

Note: Full adjustment model adjusted for: gender; age; race; education; alcohol; HBV infection; HCV infection; physical activity status; serum cotinine levels; dietary vitamin C supplement, dietary vitamin C intake by food, and poverty income ratio. <sup>1</sup>Other races include American Indian or Alaska Native, Native Hawaiian or other Pacific Islander, and multiracial persons.

Abbreviations: NHANES, National Health and Nutrition Examination Survey; MAFLD, metabolic dysfunction-associated fatty liver disease; OR, odds ratio; 95%CI, 95% confidence interval.

Supplementary Table 4 Subgroup analysis of associations between serum vitamin C level and significant liver fibrosis(n=4494), NHANES 2017–2018.

| <b>Full adjustment model OR (95%CI), P</b> |           |                  |                  |                  |
|--------------------------------------------|-----------|------------------|------------------|------------------|
| <b>Quartiles of vitamin C, umol/L</b>      | Q1(<30.9) | Q2(30.9-50.5)    | Q3(50.5-67.0)    | Q4(≥67.0)        |
| <b>Stratified by age group(years)</b>      |           |                  |                  |                  |
| 18-39                                      | Referenc  | 0.458(0.286,0.73 | 0.338(0.192,0.59 | 0.511(0.243,1.07 |
|                                            | e         | 2)0.001          | 4) <0.001        | 5)0.077          |
| 40-59                                      | Referenc  | 0.697(0.420,1.15 | 0.516(0.289,0.92 | 0.962(0.509,1.81 |
|                                            | e         | 5)0.161          | 1)0.025          | 8)0.904          |
| 60-80                                      | Referenc  | 0.672(0.394,1.14 | 0.804(0.469,1.37 | 0.396(0.212,0.74 |
|                                            | e         | 7)0.145          | 7)0.427          | 0)0.004          |
| <b>Stratified by gender</b>                |           |                  |                  |                  |
| Male                                       | Referenc  | 0.561(0.381,0.82 | 0.452(0.291,0.70 | 0.722(0.408,1.27 |

|                           |          |                  |                  |                  |
|---------------------------|----------|------------------|------------------|------------------|
|                           | e        | 6)0.003          | 3) <0.001        | 9)0.265          |
| Female                    | Referenc | 0.701(0.452,1.08 | 0.716(0.439,1.16 | 0.515(0.295,0.90 |
|                           | e        | 7)0.112          | 7)0.180          | 2)0.020          |
| <b>Stratified by race</b> |          |                  |                  |                  |
| Hispanic                  | Referenc | 0.733(0.430,1.24 | 0.506(0.280,0.91 | 0.509(0.253,1.02 |
|                           | e        | 8)0.252          | 6)0.024          | 5)0.059          |
| Non-Hispanic White        | Referenc | 0.449(0.276,0.73 | 0.502(0.304,0.82 | 0.590(0.329,1.05 |
|                           | e        | 2)0.001          | 7)0.007          | 9)0.077          |
| Non-Hispanic Black        | Referenc | 1.440(0.905,2.29 | 1.264(0.757,2.11 | 0.992(0.546,1.80 |
|                           | e        | 2)0.124          | 2)0.370          | 5)0.980          |
| Non-Hispanic Asian        | Referenc | 0.499(0.236,1.05 | 0.342(0.153,0.76 | 0.435(0.196,0.96 |
|                           | e        | 5)0.069          | 6)0.009          | 4)0.040          |
| Other races <sup>1</sup>  | Referenc | 0.515(0.148,1.78 | 0.396(0.114,1.38 | 0.190(0.040,0.90 |
|                           | e        | 9)0.296          | 4)0.147          | 0)0.036          |
| <b>Stratified by BMI</b>  |          |                  |                  |                  |
| <25kg/m <sup>2</sup>      | Referenc | 0.677(0.361,1.27 | 0.378(0.156,0.91 | 0.603(0.185,1.97 |
|                           | e        | 0)0.225          | 9)0.032          | 1)0.403          |
| 25-30kg/m <sup>2</sup>    | Referenc | 0.715(0.393,1.30 | 0.386(0.195,0.76 | 0.604(0.313,1.16 |
|                           | e        | 2)0.273          | 6)0.006          | 6)0.133          |
| ≥30kg/m <sup>2</sup>      | Referenc | 0.567(0.386,0.83 | 0.748(0.484,1.15 | 0.536(0.323,0.88 |
|                           | e        | 3)0.004          | 8)0.193          | 7)0.015          |

Note: Full adjustment model adjusted for: gender; age; race; education; alcohol; diabetes; HBV infection; HCV infection; physical activity status; serum cotinine levels; dietary vitamin C supplement; dietary vitamin C intake by food; BMI, and poverty income ratio. <sup>1</sup>Other races include American Indian or Alaska Native, Native Hawaiian or other Pacific Islander, and multiracial persons.

Abbreviations: NHANES, National Health and Nutrition Examination Survey; BMI, body mass index; OR, odds ratio; 95%CI, 95% confidence interval.
